# Supplementary material for: Quality of Life in Wilson’s Disease: A Systematic Literature Review
Source: PubMed Central journal article supplement (PMC8655222; doi:10.36469/jheor.2021.29987), 2021-12-08
Supplement: jheor_2021_8_2_29987_75961.pdf [file jheor_2021_8_2_29987_75961.pdf]

### Online Supplementary Material

Balijepalli C, Yan K, Gullapalli L, Barakat S, Chevrou-Severac H, Druyts E. Quality of Life in Wilson's Disease: A Systematic Literature Review. *JHEOR*. 2021;8(2):105-113. doi:10.36469/jheor.2021

**Table S1.** EMBASE Search

**Table S2.** MEDLINE Search Strategy

**Table S3.** PICOS Criteria

This supplementary material has been provided by the authors to give readers additional information about their work.

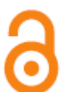

**Table S1. EMBASE Search Strategy**

| No. | Search Terms*                                                                                                                                                                                                                                             | Results |
|-----|-----------------------------------------------------------------------------------------------------------------------------------------------------------------------------------------------------------------------------------------------------------|---------|
| 1   | exp wilsons disease/                                                                                                                                                                                                                                      | 10 289  |
| 2   | (wilsons disease or Wilson disease or Wilson's disease).mp. [mp=title, abstract, heading word, drug trade name, original title, device manufacturer, drug manufacturer, device trade name, keyword, floating subheading word, candidate term word]        | 11 701  |
| 3   | hepatolenticular degeneration.mp.                                                                                                                                                                                                                         | 577     |
| 4   | progressive lenticular degeneration.mp.                                                                                                                                                                                                                   | 14      |
| 5   | copper storage disease.mp.                                                                                                                                                                                                                                | 38      |
| 6   | or/1-5                                                                                                                                                                                                                                                    | 11 741  |
| 7   | socioeconomics/                                                                                                                                                                                                                                           | 145 802 |
| 8   | exp quality of life/                                                                                                                                                                                                                                      | 534 461 |
| 9   | quality of life.ab,ti,kw.                                                                                                                                                                                                                                 | 493 850 |
| 10  | ((instrument or instruments) adj3 quality of life).ab.                                                                                                                                                                                                    | 4934    |
| 11  | quality-adjusted life year/                                                                                                                                                                                                                               | 29 060  |
| 12  | quality adjusted life.ti,ab,kw.                                                                                                                                                                                                                           | 21 977  |
| 13  | (qaly* or qald* or qale* or qtime* or life year or life years).ti,ab,kw.                                                                                                                                                                                  | 36 662  |
| 14  | disability adjusted life.ti,ab,kw.                                                                                                                                                                                                                        | 4696    |
| 15  | daly*.ti,ab,kw.                                                                                                                                                                                                                                           | 4613    |
| 16  | (sf36 or sf 36 or short form 36 or shortform 36 or short form36 or shortform36 or sf thirtysix or sfthirtysix or sfthirty six or sf thirty six or shortform thirtysix or shortform thirty six or short form thirtysix or short form thirty six).ti,ab,kw. | 44 503  |
| 17  | (sf6 or sf 6 or short form 6 or shortform 6 or sf six or sfsix or shortform six or short form six or shortform6 or short form6).ti,ab,kw.                                                                                                                 | 2580    |
| 18  | (sf8 or sf 8 or sf eight or sfeight or shortform 8 or shortform 8 or shortform8 or short form8 or shortform eight or short form eight).ti,ab,kw.                                                                                                          | 899     |
| 19  | (sf12 or sf 12 or short form 12 or shortform 12 or short form12 or shortform12 or sf twelve or sftwelve or shortform twelve or short form twelve).ti,ab,kw.                                                                                               | 10 355  |
| 20  | (sf16 or sf 16 or short form 16 or shortform 16 or short form16 or shortform16 or sf sixteen or sfsixteen or shortform sixteen or short form sixteen).ti,ab,kw.                                                                                           | 62      |
| 21  | (sf20 or sf 20 or short form 20 or shortform 20 or short form20 or shortform20 or sf twenty or sftwenty or shortform twenty or short form twenty).ti,ab,kw.                                                                                               | 476     |
| 22  | (hql or hqol or h qol or hrqol or hr qol).ti,ab,kw.                                                                                                                                                                                                       | 31 654  |
| 23  | (hye or hyes).ti,ab,kw.                                                                                                                                                                                                                                   | 146     |
| 24  | (health* adj2 year* adj2 equivalent*).ti,ab,kw.                                                                                                                                                                                                           | 55      |
| 25  | (pqol or qls).ti,ab,kw.                                                                                                                                                                                                                                   | 668     |
| 26  | (quality of wellbeing or quality of well being or index of wellbeing or index of well being or qwb).ti,ab,kw.                                                                                                                                             | 776     |
| 27  | nottingham health profile*.ti,ab,kw.                                                                                                                                                                                                                      | 1586    |
| 28  | nottingham health profile/                                                                                                                                                                                                                                | 545     |
| 29  | sickness impact profile.ti,ab,kw.                                                                                                                                                                                                                         | 1264    |
| 30  | sickness impact profile/                                                                                                                                                                                                                                  | 2351    |
| 31  | health status indicator/                                                                                                                                                                                                                                  | 3177    |
| 32  | (health adj3 (utilit* or status)).ti,ab,kw.                                                                                                                                                                                                               | 102 587 |
| 33  | (utilit* adj3 (valu* or measur* or health or life or estimat* or elicit* or disease or score* or weight)).ti,ab,kw.                                                                                                                                       | 21 377  |
| 34  | (preference* adj3 (valu* or measur* or health or life or estimat* or elicit* or disease or score* or instrument or instruments)).ti,ab,kw.                                                                                                                | 15 728  |
| 35  | disutilit*.ti,ab,kw.                                                                                                                                                                                                                                      | 1007    |
| 36  | rosser.ti,ab,kw.                                                                                                                                                                                                                                          | 127     |

**Table S1. EMBASE Search Strategy, cont'd**

| No. | Search Terms*                                                                   | Results |
|-----|---------------------------------------------------------------------------------|---------|
| 37  | willingness to pay.ti,ab,kw.                                                    | 10 109  |
| 38  | standard gamble*.ti,ab,kw.                                                      | 1149    |
| 39  | (time trade off or time tradeoff).ti,ab,kw.                                     | 2115    |
| 40  | tto.ti,ab,kw.                                                                   | 1837    |
| 41  | (hui or hui1 or hui2 or hui3).ti,ab,kw.                                         | 2533    |
| 42  | (eq or euroqol or euro qol or eq5d or eq 5d or euroqual or euro qual).ti,ab,kw. | 30 146  |
| 43  | duke health profile.ti,ab,kw.                                                   | 114     |
| 44  | functional status questionnaire.ti,ab,kw.                                       | 161     |
| 45  | dartmouth coop functional health assessment*.ti,ab,kw.                          | 13      |
| 46  | or/7-45                                                                         | 921 852 |
| 47  | 6 and 46                                                                        | 230     |

\* Materials published 1974–July 24, 2021.

**Table S2. MEDLINE Search Strategy**

| No. | Search Terms*                                                                                                                                                                                                                                                                                                                                   | Results |
|-----|-------------------------------------------------------------------------------------------------------------------------------------------------------------------------------------------------------------------------------------------------------------------------------------------------------------------------------------------------|---------|
| 1   | exp wilsons disease/                                                                                                                                                                                                                                                                                                                            | 5948    |
| 2   | (wilsons disease or wilson disease or wilson's disease).mp. [mp=title, abstract, original title, name of substance word, subject heading word, floating sub-heading word, keyword heading word, organism supplementary concept word, protocol supplementary concept word, rare disease supplementary concept word, unique identifier, synonyms] | 6162    |
| 3   | hepatolenticular degeneration.mp.                                                                                                                                                                                                                                                                                                               | 6028    |
| 4   | progressive lenticular degeneration.mp.                                                                                                                                                                                                                                                                                                         | 10      |
| 5   | copper storage disease.mp.                                                                                                                                                                                                                                                                                                                      | 27      |
| 6   | or/1-5                                                                                                                                                                                                                                                                                                                                          | 7868    |
| 7   | Value of life/                                                                                                                                                                                                                                                                                                                                  | 5749    |
| 8   | Quality of life/                                                                                                                                                                                                                                                                                                                                | 212 477 |
| 9   | quality of life.ab,ti,kf.                                                                                                                                                                                                                                                                                                                       | 309 986 |
| 10  | ((instrument or instruments) adj3 quality of life).ab.                                                                                                                                                                                                                                                                                          | 3564    |
| 11  | Quality-Adjusted Life Years/                                                                                                                                                                                                                                                                                                                    | 13 336  |
| 12  | quality adjusted life.ti,ab,kf.                                                                                                                                                                                                                                                                                                                 | 14 357  |
| 13  | (qaly* or qald* or qale* or qtime* or life year or life years).ti,ab,kf.                                                                                                                                                                                                                                                                        | 22 930  |
| 14  | disability adjusted life.ti,ab,kf.                                                                                                                                                                                                                                                                                                              | 3904    |
| 15  | daly*.ti,ab,kf.                                                                                                                                                                                                                                                                                                                                 | 3524    |
| 16  | (sf36 or sf 36 or short form 36 or shortform 36 or short form36 or shortform36 or sf thirtysix or sfthirtysix or sfthirty six or sf thirty six or shortform thirtysix or shortform thirty six or short form thirtysix or short form thirty six).ti,ab,kf.                                                                                       | 27 323  |
| 17  | (sf6 or sf 6 or short form 6 or shortform 6 or sf six or sfsix or shortform six or short form six or shortform6 or short form6).ti,ab,kf.                                                                                                                                                                                                       | 2285    |
| 18  | (sf8 or sf 8 or sf eight or sfeight or shortform 8 or shortform 8 or shortform8 or short form8 or shortform eight or short form eight).ti,ab,kf.                                                                                                                                                                                                | 540     |
| 19  | (sf12 or sf 12 or short form 12 or shortform 12 or short form12 or shortform12 or sf twelve or sftwelve or shortform twelve or short form twelve).ti,ab,kf.                                                                                                                                                                                     | 6436    |
| 20  | (sf16 or sf 16 or short form 16 or shortform 16 or short form16 or shortform16 or sf sixteen or sfsixteen or shortform sixteen or short form sixteen).ti,ab,kf.                                                                                                                                                                                 | 36      |

| No. | Search Terms*                                                                                                                              | Results |
|-----|--------------------------------------------------------------------------------------------------------------------------------------------|---------|
| 22  | (hql or hqol or h qol or hrqol or hr qol).ti,ab,kf.                                                                                        | 19 448  |
| 23  | (hye or hyes).ti,ab,kf.                                                                                                                    | 74      |
| 24  | (health* adj2 year* adj2 equivalent*).ti,ab,kf.                                                                                            | 48      |
| 25  | (pqol or qls).ti,ab,kf.                                                                                                                    | 408     |
| 26  | (quality of wellbeing or quality of well being or index of wellbeing or index of well being or qwb).ti,ab,kf.                              | 625     |
| 27  | nottingham health profile*.ti,ab,kf.                                                                                                       | 1190    |
| 28  | sickness impact profile.ti,ab,kf.                                                                                                          | 1081    |
| 29  | exp health status indicators/                                                                                                              | 321 348 |
| 30  | (health adj3 (utilit* or status)).ti,ab,kf.                                                                                                | 78 121  |
| 31  | (utilit* adj3 (valu* or measur* or health or life or estimat* or elicit* or disease or score* or weight)).ti,ab,kf.                        | 13 312  |
| 32  | (preference* adj3 (valu* or measur* or health or life or estimat* or elicit* or disease or score* or instrument or instruments)).ti,ab,kf. | 11 935  |
| 33  | disutilit*.ti,ab,kf.                                                                                                                       | 507     |
| 34  | rosser.ti,ab,kf.                                                                                                                           | 100     |
| 35  | willingness to pay.ti,ab,kf.                                                                                                               | 6525    |
| 36  | standard gamble*.ti,ab,kf.                                                                                                                 | 878     |
| 37  | (time trade off or time tradeoff).ti,ab,kf.                                                                                                | 1487    |
| 38  | tto.ti,ab,kf.                                                                                                                              | 1162    |
| 39  | (hui or hui1 or hui2 or hui3).ti,ab,kf.                                                                                                    | 1660    |
| 40  | (eq or euroqol or euro qol or eq5d or eq 5d or euroqual or euro qual).ti,ab,kf.                                                            | 17 897  |
| 41  | duke health profile.ti,ab,kf.                                                                                                              | 89      |
| 42  | functional status questionnaire.ti,ab,kf.                                                                                                  | 125     |
| 43  | dartmouth coop functional health assessment*.ti,ab,kf.                                                                                     | 13      |
| 44  | or/7-43                                                                                                                                    | 762 039 |
| 45  | 6 and 44                                                                                                                                   | 194     |

\* Databases include Ovid MEDLINE® and Epub Ahead of Print, In-Process & Other Non-Indexed Citations, Daily and Versions®, 1946–July 24, 2021.

**Table S3. PICOS Criteria**

| Criteria      | Description                                                                                                                                                                                                                                                                                                                                                                                                                                                       |
|---------------|-------------------------------------------------------------------------------------------------------------------------------------------------------------------------------------------------------------------------------------------------------------------------------------------------------------------------------------------------------------------------------------------------------------------------------------------------------------------|
| Population    | Individuals (all ages) diagnosed with Wilson's disease                                                                                                                                                                                                                                                                                                                                                                                                            |
| Interventions | Not restricted                                                                                                                                                                                                                                                                                                                                                                                                                                                    |
| Comparators   | Not restricted                                                                                                                                                                                                                                                                                                                                                                                                                                                    |
| Outcomes      | Patient/Physician/Caregiver <ul style="list-style-type: none"> <li>• Generic quality of life</li> <li>• Disease-specific quality of life</li> <li>• Generic health-related quality of life measures</li> <li>• Disease-specific health-related quality of life measures</li> </ul>                                                                                                                                                                                |
| Study design  | <ul style="list-style-type: none"> <li>• Randomized controlled trials and non-randomized clinical trials</li> <li>• Observational studies reporting health-related quality of life/utility (e.g. controlled before-and-after studies, interrupted time series studies, historically controlled studies, prospective and retrospective cohort studies, case-control studies, cross-sectional studies, controlled and uncontrolled longitudinal studies)</li> </ul> |
| Language      | <ul style="list-style-type: none"> <li>• Studies published in English will be included</li> </ul>                                                                                                                                                                                                                                                                                                                                                                 |
